# Supplementary material for: Towards Differentiated Governance: A Typology and Differentiated Governance Framework for County-Level Traditional Chinese Medicine Hospitals in China
Source: Research Square preprint supplement (doi:10.21203/rs.3.rs-8760076/v1), 2026-02-12
Supplement: Supplementary file 1 [file 8163a76eee925bd4090fd1bb.docx]

**A****ppendix A:** Basic characteristics of public county-level TCM hospitals and integrated TCM-Western Medicine hospitals in Zhejiang Province, China (Data as of November 2025).

| City | District/  County/City | City hospital name | Hospital grade | Approved beds | Floor area |
| --- | --- | --- | --- | --- | --- |
| Hangzhou | Shangchen | Shangcheng District Hospital of TCM | unrated | 60 | 0.49 |
| Gongshu | Gongshu District People's Hospital of Integrated Chinese and Western Medicine | secondary grade a | 349 | 2.00 |
| Gongshu District Hospital of TCM | unrated | 99 | 0.82 |
| Xihu | Xihu District Hospital of Integrated Chinese and Western Medicine | unrated | 135 | 2.34 |
| Binjiang | Bingjiang District Hospital of TCM | unrated | 220 | 3.09 |
| Xiaoshan | Xiaoshan District Hospital of TCM | tertiary grade a | 1000 | 8.95 |
| Yuhang | NA | NA | NA | NA |
| Linping | Linping District Hospital of TCM | tertiary grade b | 450 | 10.60 |
| Linping District Hospital of Integrated Chinese and Western Medicine | tertiary grade b | 450 | 6.67 |
| Qiantang | NA | NA | NA | NA |
| Fuyang | Fuyang District Hospital of TCM | tertiary grade b | 600 | 4.50 |
| Lin’an | Lin’an District Hospital of TCM | tertiary grade b | 450 | 11.14 |
| Tonglu | Tonglu County Hospital of TCM | tertiary grade b | 450 | 6.00 |
| Chun’an | Chun’an County Hospital of TCM | tertiary grade b | 550 | 7.36 |
| Jiande | Jiande Hospital of TCM | secondary grade a | 350 | 2.79 |
| Ningbo | Haishu | Haishu District Hospital of TCM | unrated | 105 | 1.78 |
| Jiangbei | Jiangbei District Hospital of TCM | unrated | 43 | 0.3 |
| Zhenhai | Zhenhai District Hospital of TCM | tertiary grade b | 600 | 3.20 |
| Beilun | Beilun District Hospital of TCM | secondary grade a | 250 | 2.50 |
| Yinzhou | Ningbo Hospital of Integrated Chinese and Western Medicine | tertiary grade b | 1000 | 15.0 |
| Fenghua | Fenghua District Hospital of TCM | tertiary grade a | 600 | 10.11 |
| Yuyao | Yuyao Hospital of TCM | tertiary grade b | 450 | 6.50 |
| Cixi | Cixi Hospital of TCM | secondary grade a | 250 | 2.35 |
| Ninghai | Ninghai County Hospital of TCM | secondary grade a | 500 | 6.13 |
| Xiangshan | Xiangshan County Hospital of TCM | secondary grade a | 520 | 7.68 |
| Wenzhou | Lucheng | NA | NA | NA | NA |
| Longwan | Longwan District Hospital of Integrated Chinese and Western Medicine | unrated | 100 | 0.80 |
| Ouhai | Ouhai District Hospital of Integrated Chinese and Western Medicine | secondary grade b | 100 | 1.40 |
| Dongtou | Dongtou District Hospital of TCM | unrated | 56 | 0.71 |
| Rui’an | Rui’an Hospital of TCM | tertiary grade b | 500 | 5.00 |
| Yueqing | Yueqing Hospital of TCM | secondary grade a | 255 | 0.80 |
| Longgang | NA | NA | NA | NA |
| Yongjia | Yongjia County Hospital of TCM | tertiary grade b | 450 | 5.00 |
| Pingyang | Pingyang County Hospital of TCM | tertiary grade b | 800 | 9.80 |
| Cangnan | Cangnan County Hospital of TCM | tertiary grade b | 499 | 5.96 |
| Wencheng | Wencheng County Hospital of TCM | unrated | 100 | 0.59 |
| Taishun | Taishun County Hospital of TCM | secondary grade a | 250 | 3.65 |
| Jiaxing | Nanhu | NA | NA | NA | NA |
| Xiuzhou | NA | NA | NA | NA |
| Jiashan | Jiashan County Hospital of TCM | tertiary grade b | 450 | 4.30 |
| Haiyan | Haiyan County Hospital of TCM | secondary grade a | 495 | 8.10 |
| Pinghu | Pinghu Hospital of TCM | tertiary grade b | 600 | 10.83 |
| Haining | Haining Hospital of TCM | tertiary grade b | 600 | 9.00 |
| Tongxiang | Tongxiang Hospital of TCM | tertiary grade b | 1188 | 15.00 |
| Huzhou | Wuxing | Wuxing District Hospital of TCM | unrated | 390 | 7.00 |
| Nanxun | Nanxun District Hospital of TCM | secondary grade a | 450 | 8.50 |
| Deqing | Deqing County Hospital of TCM | secondary grade a | 250 | 2.67 |
| Changxing | Changxing County Hospital of TCM | tertiary grade a | 730 | 7.00 |
| Anji | Anji County Hospital of TCM | tertiary grade b | 300 | 2.33 |
| Shaoxing | Yuecheng | NA | NA | NA | NA |
| Keqiao | Keqiao District Hospital of TCM | tertiary grade b | 520 | 8.00 |
| Shangyu | Shangyu District Hospital of TCM | tertiary grade a | 1000 | 14.4 |
| Zhuji | Zhuji Hospital of TCM | tertiary grade a | 1200 | 7.27 |
| Shengzhou | Shengzhou Hospital of TCM | tertiary grade b | 550 | 7.75 |
| Xinchang | Xinchang County Hospital of TCM | tertiary grade a | 600 | 5.50 |
| Jinhua | Wucheng | Wucheng District Hospital of TCM | unrated | 350 | 5.20 |
| Jindong | Jindong District Hospital of TCM | secondary grade b | 300 | 6.90 |
| Yiwu | Yiwu Hospital of TCM | tertiary grade a | 600 | 8.40 |
| Dongyang | Dongyang Hospital of TCM | tertiary grade a | 450 | 3.00 |
| Lanxi | Lanxi Hospital of TCM | secondary grade a | 600 | 9.88 |
| Yongkang | Yongkang Hospital of TCM | tertiary grade b | 850 | 8.70 |
| Pujiang | Pujiang County Hospital of TCM | secondary grade a | 750 | 9.60 |
| Pan’an | Pan’an County Hospital of TCM | secondary grade a | 450 | 6.8 |
| Wuyi | Wuyi County Hospital of TCM | secondary grade a | 450 | 6.60 |
| Quzhou | Kecheng | Kecheng District Hospital of TCM | secondary grade a | 250 | 3.85 |
| Qujiang | Qujiang District Hospital of TCM | secondary grade a | 250 | 2.00 |
| Jiangshan | Jiangshan Hospital of TCM | secondary grade a | 250 | 1.25 |
| Longyou | Longyou County Hospital of TCM | secondary grade a | 250 | 1.70 |
| Changshan | Changshan County Hospital of TCM | secondary grade a | 260 | 2.47 |
| Kaihua | Kaihua County Hospital of TCM | tertiary grade b | 310 | 3.97 |
| Zhoushan | Dinghai | NA | NA | NA | NA |
| Putuo | NA | NA | NA | NA |
| Daishan | Daishan County Hospital of TCM | secondary grade b | 120 | 0.64 |
| Shengsi | Shengsi County Hospital of TCM | unrated | 60 | 0.40 |
| Taizhou | Jiaojiang | NA | NA | NA | NA |
| Huangyan | Huangyan District Hospital of TCM | secondary grade a | 400 | 8.06 |
| Luqiao | Luqiao District Hospital of TCM | secondary grade a | 260 | 3.64 |
| Linhai | Linhai Hospital of TCM | secondary grade a | 250 | 1.00 |
| Wenling | Wenling Hospital of TCM | tertiary grade a | 800 | 3.81 |
| Yuhuan | Yuhuan Hospital of TCM | secondary grade a | 250 | 2.09 |
| Tiantai | Tiantai County Hospital of TCM | secondary grade a | 450 | 4.10 |
| Xianju | Xianju County Hospital of TCM | secondary grade a | 250 | 1.10 |
| Sanmen | Sanmen County Hospital of TCM | secondary grade a | 200 | 1.00 |
| Lishui | Liandu | NA | NA | NA | NA |
| Longquan | Longquan Hospital of TCM | secondary grade a | 100 | 0.40 |
| Qingtian | Qingtian County Hospital of TCM | secondary grade a | 399 | 6.70 |
| Yunhe | Yunhe County Hospital of TCM | secondary grade b | 250 | 2.90 |
| Qingyuan | Qingyuan County Hospital of TCM | secondary grade a | 250 | 1.38 |
| Jinyun | Jinyun County Hospital of TCM | secondary grade a | 277 | 3.82 |
| Suichang | Suichang County Hospital of TCM | secondary grade a | 213 | 1.04 |
| Songyang | Songyang County Hospital of TCM | secondary grade a | 500 | 7.04 |
| Jingning | NA | NA | NA | NA |

**Note:** “County-level” here includes districts, counties, and county-level cities. Data as of November 2025. “NA” indicates that no such hospital was established at the county level in that area.

**Sources:** Developed by the authors.

**Appendix B:** Underlying Socio-Economic Data for Assessing TCM Development Potential at the County Level in Zhejiang, 2024

| City | District/  County/City | Resident population (10,000 persons) | Gross regional product (100 million yuan) | General public budget expenditure (100 million yuan) | Per capita consumption expenditure (yuan) | Fiscal self-sufficiency rate (%) 1 | Municipal-Level Elderly Population Proportion (%) 2 |
| --- | --- | --- | --- | --- | --- | --- | --- |
| Hangzhou | Shangchen | 139.8 | 2803.51 | 145.04 | 58957 | 153.14 | 25.87 |
| Gongshu | 119.8 | 2206.3 | 179.06 | 58718 | 126.57 |
| Xihu | 117.7 | 2331.5 | 225.6 | 568783 | 117.93 |
| Binjiang | 55.2 | 2887.8 | 262 | 59830 | 136.53 |
| Xiaoshan | 216.4 | 2431.65 | 322.61 | 51877 | 96.49 |
| Yuhang | 142.2 | 3355.67 | 429.28 | 53346 | 116.79 |
| Linping | 114.2 | 1175.09 | 145.86 | 51088 | 85.83 |
| Qiantang | 80.5 | 1416.82 | 134.85 | 49793 | 95.19 |
| Fuyang | 86.1 | 1004.7 | 100.98 | 50322 | 73.84 |
| Lin’an | 65.6 | 732.9 | 95.49 | 471544 | 87.54 |
| Tonglu | 46.1 | 502.06 | 45.66 | 36201 | 58.73 |
| Chun’an | 32.0 | 294.85 | 28.21 | 26731 | 30.91 |
| Jiangde | 44.4 | 460.36 | 45.89 | 37310 | 48.28 |
| Ningbo | Haishu | 107.2 | 1750.19 | 125.34 | 56106 | 93.78 | 30.15 |
| Jiangbei | 51.8 | 1012.9 | 109.5 | 48966 | 107.99 |
| Zhenhai | 53.2 | 1512.1 | 91.1 | 532853 | 87.43 |
| Beilun | 90.4 | 3035.04 | 404.06 | 48316 | 105.30 |
| Yinzhou | 171.1 | 3112.7 | 253.55 | 59895 | 115.95 |
| Fenghua | 59.2 | 1102.18 | 87.16 | 536033 | 66.43 |
| Yuyao | 126.7 | 1682.78 | 137.73 | 48297 | 84.78 |
| Cixi | 159.9 | 2928.64 | 227.35 | 49327 | 89.41 |
| Ninghai | 71.3 | 1068.04 | 70.24 | 46769 | 60.33 |
| Xiangshan | 57.9 | 942.99 | 67.93 | 40436 | 49.49 |
| Wenzhou | Lucheng | 122.68 | 1507.8 | 31.43 | 67703 | 35.44 | 23.15 |
| Longwan | 76.19 | 1005.81 | 56.83 | 55747 | 77.37 |
| Ouhai | 101.69 | 976.27 | 42.9 | 53068 | 58.36 |
| Dongtou | 16.17 | 197.44 | 16.92 | 44336 | 36.16 |
| Rui’an | 154.48 | 1452 | 80.5 | 527683 | 55.83 |
| Yueqing | 148.48 | 1858.5 | 100.06 | 53803 | 77.61 |
| Longgang | 47.68 | 443.73 | 21.21 | 42801 | 47.59 |
| Yongjia | 88.64 | 606.35 | 40.95 | 38797 | 42.65 |
| Pingyang | 87.74 | 777.46 | 40.12 | 39251 | 44.57 |
| Cangnan | 85.1 | 543.2 | 33.8 | 321064 | 30.76 |
| Wencheng | 29.3 | 165.75 | 10.75 | 35860 | 20.14 |
| Taishun | 27.05 | 184 | 16.3 | 34484 | 25.08 |
| Jiaxing | Nanhu | 88.00 | 828.45 | 70.01 | 509983 | 105.14 | 30.90 |
| Xiuzhou | 79.7 | 963.27 | 45.33 | 43691 | 82.92 |
| Jiashan | 66.8 | 958.29 | 76.32 | 42792 | 84.19 |
| Haiyan | 47.69 | 725.37 | 63.72 | 549273 | 64.31 |
| Pinghu | 69.65 | 1078.3 | 95.1 | 490813 | 82.27 |
| Haining | 110.9 | 1397.16 | 102.1 | 496293 | 78.90 |
| Tongxiang | 106.3 | 1347.11 | 102.1 | 40872 | 72.87 |
| Huzhou | Wuxing | 106.0 | 935.3 | 67.6 | 494425 | 104.97 | 31.45 |
| Nanxun | 47.88 | 599.1 | 44.46 | 405243 | 64.21 |
| Deqing | 56.1 | 722.5 | 85.1 | 529673 | 82.31 |
| Changxing | 68.8 | 927.8 | 88.63 | 43420 | 76.01 |
| Anji | 60.4 | 675.57 | 62.51 | 519253 | 73.65 |
| Shaoxing | Yuecheng | 113.63 | 1413.57 | 90.65 | 45687 | 81.32 | 31.76 |
| Keqiao | 113.29 | 2252.28 | 143.59 | 49528 | 131.65 |
| Shangyu | 80.9 | 1381.37 | 98.03 | 511563 | 80.08 |
| Zhuji | 123.82 | 1861.08 | 100 | 37776 | 75.99 |
| Shenzhou | 69.81 | 800.25 | 52.27 | 35368 | 51.54 |
| Xinchang | 41.45 | 660.06 | 50 | 40340 | 63.65 |
| Jinhua | Wucheng | 98.2 | 871.66 | 14.88 | 45378 | 32.01 | 26.22 |
| Jindong | 52.7 | 415.59 | 28.3 | 428563 | 51.36 |
| Yiwu | 191.8 | 2503.51 | 150.1 | 53781 | 88.29 |
| Dongyang | 109.5 | 875.14 | 81.33 | 48486 | 66.27 |
| Lanxi | 58.4 | 554.82 | 39.24 | 361373 | 46.78 |
| Yongkang | 98.1 | 835.53 | 75.27 | 491014 | 75.55 |
| Pujiang | 46.9 | 320.24 | 26.61 | 34765 | 43.25 |
| Pan’an | 17.9 | 154.81 | 14.99 | 421783 | 33.46 |
| Wuyi | 47.4 | 394.21 | 37.72 | 36163 | 53.92 |
| Quzhou | Kecheng | 55.2 | 705.73 | 15.68 | 37501 | 23.05 | 28.17 |
| Qujiang | 40.9 | 362.75 | 19.58 | 31221 | 24.10 |
| Jiangshan | 49.2 | 430.47 | 35.2 | 350543 | 38.26 |
| Longyou | 36.9 | 337.52 | 34.03 | 29658 | 39.48 |
| Changshan | 26.4 | 223.3 | 20.437 | 23984 | 26.13 |
| Kaihua | 24.5 | 203.07 | 16.76 | 24687 | 23.37 |
| Zhoushan | Dinghai | 51.02 | 772.8 | 32.38 | 46614 | 54.80 | 36.15 |
| Putuo | 38.66 | 488.16 | 33.91 | 41918 | 44.99 |
| Daishan | 21.51 | 793.5 | 24.18 | 403193 | 44.10 |
| Shengsi | 6.4 | 172.36 | 9.52 | 40064 | 24.45 |
| Taizhou | Jiaojiang | 89.2 | 880.64 | 50.3 | 53051 | 73.94 | 26.16 |
| Huangyan | 70.2 | 647.03 | 51.39 | 42812 | 72.69 |
| Luqiao | 63.3 | 790.6 | 50.95 | 47712 | 94.84 |
| Linhai | 111.1 | 971.68 | 69.02 | 391024 | 55.51 |
| Wenling | 145.8 | 1417.63 | 85.57 | 48250 | 71.52 |
| Yuhuan | 64.3 | 795.06 | 58.46 | 51977 | 73.42 |
| Tiantai | 46.8 | 391.67 | 23.44 | 32032 | 32.67 |
| Xianju | 43.4 | 349.04 | 29.48 | 33487 | 41.16 |
| Sanmen | 38.8 | 386.26 | 34.7 | 32774 | 49.07 |
| Lishui | Liandu | 57.9 | 596.86 | 61.08 | 45353 | 38.66 | 24.35 |
| Longquan | 25.2 | 201.5 | 13.78 | 454823 | 20.52 |
| Qingtian | 51.75 | 319.99 | 26.75 | 41290 | 34.70 |
| Yunhe | 12.64 | 118.4 | 10.2915 | 376633 | 24.65 |
| Qingyuan | 14.12 | 114.42 | 7.06 | 30077 | 14.91 |
| Jinyun | 40.9 | 342.42 | 26.01 | 38774 | 29.74 |
| Suichang | 19.4 | 194.35 | 18.03 | 36955 | 31.78 |
| Songyang | 20.3 | 173.58 | 11.43 | 385663 | 20.25 |
| Jingning | 11.08 | 119.7 | 18.77 | 30829 | 32.31 |

**Note:** Data in this table, unless otherwise noted, are derived from the 2024 National Economic and Social Development Statistical Bulletins of respective districts and counties.

1 Fiscal Self-Sufficiency Rate = (General Public Budget Revenue / General Public Budget Expenditure) × 100%, calculated by the author.

2 Data for the Municipal-Level Elderly Population Proportion are from the 2024 Zhejiang Provincial Statistical Bulletin on the Elderly Population and Aging Initiatives.

3 Data represent the per capita disposable consumption expenditure of urban residents.

4 Data on per capita disposable consumption expenditure of urban residents are from the 2024 Statistical Yearbook of the respective locality.

5 Data missing; estimated using the 2024 per capita consumption expenditure of urban residents in Huzhou city.

**Sources:** Developed by the authors.

**Appendix C.** Complete List of the 78 County-Level Units by Cluster and Region

| **Cluster Code** | **District (English)** | **区/县/市 (中文)** | **Region (Prefecture-Level City)** |
| --- | --- | --- | --- |
| **Hangzhou** | | | |
| I | Xiaoshan | 萧山区 | Hangzhou |
| I | Linping | 临平区 | Hangzhou |
| I | Lin’an | 临安区 | Hangzhou |
| II | Fuyang | 富阳区 | Hangzhou |
| II | Tonglu | 桐庐县 | Hangzhou |
| II | Chun’an | 淳安县 | Hangzhou |
| III | Shangchen | 上城区 | Hangzhou |
| III | Gongshu | 拱墅区 | Hangzhou |
| III | Xihu | 西湖区 | Hangzhou |
| III | Binjiang | 滨江区 | Hangzhou |
| IV | Jiande | 建德市 | Hangzhou |
| **Ningbo** | | | |
| I | Zhenhai | 镇海区 | Ningbo |
| I | Yinzhou | 鄞州区 | Ningbo |
| I | Fenghua | 奉化区 | Ningbo |
| I | Yuyao | 余姚市 | Ningbo |
| II | Ninghai, | 宁海县 | Ningbo |
| II | Xiangshan | 象山县 | Ningbo |
| III | Haishu | 海曙区 | Ningbo |
| III | Jiangbei | 江北区 | Ningbo |
| III | Beilun | 北仑区 | Ningbo |
| III | Cixi | 慈溪市 | Ningbo |
| **Wenzhou** | | | |
| II | Rui’an | 瑞安市 | Wenzhou |
| II | Yongjia | 永嘉县 | Wenzhou |
| II | Pingyang | 平阳县 | Wenzhou |
| II | Cangnan | 苍南县 | Wenzhou |
| III | Longwan | 龙港市 | Wenzhou |
| III | Ouhai | 瓯海区 | Wenzhou |
| III | Yueqing | 乐清市 | Wenzhou |
| IV | Dongtou, , | 洞头区 | Wenzhou |
| IV | Wencheng | 文成县 | Wenzhou |
| IV | Taishun | 泰顺县 | Wenzhou |
| **Jiaxing** | | | |
| I | Jiashan, | 嘉善县 | Jiaxing |
| I | Haiyan | 海盐县 | Jiaxing |
| I | Pinghu | 平湖市 | Jiaxing |
| I | Haining | 海宁市 | Jiaxing |
| I | Tongxiang | 桐乡市 | Jiaxing |
| **Huzhou** | | | |
| I | Changxing | 长兴县 | Huzhou |
| II | Nanxun | 南浔区 | Huzhou |
| III | Wuxing | 吴兴区 | Huzhou |
| III | Deqing, | 德清县 | Huzhou |
| III | Anji | 安吉县 | Huzhou |
| **Shaoxing** | | | |
| I | Keqiao | 柯桥区 | Shaoxing |
| I | Shangyu | 上虞区 | Shaoxing |
| I | Zhuji | 诸暨市 | Shaoxing |
| I | Xinchang | 新昌县 | Shaoxing |
| II | Shengzhou | 嵊州市 | Shaoxing |
| **Jinhua** | | | |
| I | Yiwu | 义乌市 | Jinhua |
| I | Yongkang | 永康市 | Jinhua |
| II | Jindong | 金东区 | Jinhua |
| II | Dongyang | 东阳市 | Jinhua |
| II | Lanxi | 兰溪市 | Jinhua |
| II | Pujiang | 浦江县 | Jinhua |
| II | Pan’an | 磐安县 | Jinhua |
| II | Wuyi | 武义市 | Jinhua |
| IV | Wucheng | 婺城区 | Jinhua |
| **Quzhou** | | | |
| IV | Kecheng | 柯城区 | Quzhou |
| IV | Qujiang | 衢江区 | Quzhou |
| IV | Jiangshan | 江山市 | Quzhou |
| IV | Longyou | 龙游县 | Quzhou |
| IV | Changshan | 常山县 | Quzhou |
| IV | Kaihua | 开化县 | Quzhou |
| **Zhoushan** | | | |
| IV | Daishan | 岱山县 | Zhoushan |
| IV | Shengsi | 嵊泗县 | Zhoushan |
| **Taizhou** | | | |
| I | Wenling | 温岭市 | Taizhou |
| II | Huangyan | 黄岩区 | Taizhou |
| III | Luqiao | 路桥区 | Taizhou |
| III | Yuhuan | 玉环市 | Taizhou |
| IV | Linhai | 临海市 | Taizhou |
| IV | Tiantai | 天台县 | Taizhou |
| IV | Xianju | 仙居县 | Taizhou |
| IV | Sanmen | 三门县 | Taizhou |
| **Lishui** | | | |
| II | Qingtian | 青田县 | Lishui |
| II | Songyang | 松阳县 | Lishui |
| IV | Longquan | 龙泉市 | Lishui |
| IV | Yunhe | 云和县 | Lishui |
| IV | Qingyuan | 庆元县 | Lishui |
| IV | Jinyun | 缙云县 | Lishui |
| IV | Suichang | 遂昌县 | Lishui |

**Sources:** Developed by the authors.
